# Supplementary material for: Antiretroviral therapy suppressed participants with low CD4+ T-cell counts segregate according to opposite immunological phenotypes
Source: PubMed Central journal article supplement (PMC5017266; doi:10.1097/qad.0000000000001205), 2016-09-07
Supplement: aids-30-2275-s001.pdf [file aids-30-2275-s001.pdf]

**Supplementary Table 1: List of parameters used in this study.** Left table shows parameters available for all subjects and right table shows parameters available for a smaller subset of subjects. Parameters are grouped by function.

| Parameter                                 | Unit                                                       |
|-------------------------------------------|------------------------------------------------------------|
| <b>Clinical parameters</b>                |                                                            |
| 1 Time since diagnosis                    | years                                                      |
| 2 Time on ART                             | years                                                      |
| 3 Treatment                               | PI or NNRTI                                                |
| 4 Drug                                    | Kaletra<br>Nevirapine<br>ATV<br>Efavirenz<br>FosApv<br>SQV |
| 5 HBV infection                           | Yes or No                                                  |
| 6 HCV infection                           | Yes or No                                                  |
| 7 Detectable VL HCV                       | Yes or No                                                  |
| 8 Age                                     | Years                                                      |
| 9 Gender                                  | Male or Female                                             |
| 10 Nadir CD4 T cell count                 | cells/ $\mu$ l                                             |
| 11 Percentage of CD8                      | %                                                          |
| 12 Absolute CD8 T cell counts             | cells/ $\mu$ l                                             |
| 13 Ratio CD4/CD8                          | -                                                          |
| <b>Microbial translocation</b>            |                                                            |
| 14 Soluble CD14                           | ng/mL                                                      |
| <b>T-cell cell death</b>                  |                                                            |
| 15 Total CD4 cell death (day 0)           | % of CD4 T cells                                           |
| 16 Total CD8 cell death (day 0)           | % of CD8 T cells                                           |
| 17 Total CD4 cell death (day 1)           | % of CD4 T cells                                           |
| 18 CD4 T cell Necrosis (day 1)            | % of CD4 T cells                                           |
| 19 CD4 T cell total apoptosis (day 1)     | % of CD4 T cells                                           |
| 20 CD4 T cell intrinsic apoptosis (day 1) | % of CD4 T cells                                           |
| 21 CD4 T cell extrinsic apoptosis (day 1) | % of CD4 T cells                                           |
| 22 Total CD8 cell death (day 1)           | % of CD8 T cells                                           |
| 23 CD8 T cell Necrosis (day 1)            | % of CD8 T cells                                           |
| 24 CD8 T cell total apoptosis (day 1)     | % of CD8 T cells                                           |
| 25 CD8 T cell intrinsic apoptosis (day 1) | % of CD8 T cells                                           |
| 26 CD8 T cell extrinsic apoptosis (day 1) | % of CD8 T cells                                           |
| <b>CD4 T cells</b>                        |                                                            |
| 27 CD45RA <sup>+</sup> CD31 <sup>-</sup>  | % of CD4 T cells                                           |
| 28 CD45RA <sup>+</sup> CD31 <sup>+</sup>  | % of CD4 T cells                                           |
| 29 CD45RA <sup>+</sup> CD31 <sup>+</sup>  | % of CD4 T cells                                           |
| 30 CD45RA <sup>+</sup> CD31 <sup>-</sup>  | % of CD4 T cells                                           |
| 31 CD45RA <sup>+</sup> CD38 <sup>+</sup>  | % of CD4 T cells                                           |
| 32 CD45RA <sup>+</sup> CD38 <sup>-</sup>  | % of CD4 T cells                                           |
| 33 CD45RA <sup>+</sup> CD38 <sup>+</sup>  | % of CD4 T cells                                           |
| 34 CD45RA <sup>+</sup> CD38 <sup>-</sup>  | % of CD4 T cells                                           |
| 35 CD45RA <sup>+</sup>                    | % of CD4 T cells                                           |
| 36 CD45RA <sup>-</sup>                    | % of CD4 T cells                                           |
| 37 CD38 <sup>+</sup>                      | % of CD45RA <sup>-</sup> CD4 T cells                       |
| 38 CD31 <sup>+</sup>                      | % of CD45RA <sup>+</sup> CD4 T cells                       |
| 39 FAS <sup>+</sup> PD-1 <sup>-</sup>     | % of CD4 T cells                                           |
| 40 FAS <sup>+</sup> PD-1 <sup>+</sup>     | % of CD4 T cells                                           |
| 41 FAS <sup>-</sup> PD-1 <sup>-</sup>     | % of CD4 T cells                                           |
| 42 FAS <sup>-</sup> PD-1 <sup>+</sup>     | % of CD4 T cells                                           |
| 43 FAS <sup>+</sup> HLA-DR <sup>-</sup>   | % of CD4 T cells                                           |
| 44 FAS <sup>+</sup> HLA-DR <sup>+</sup>   | % of CD4 T cells                                           |
| 45 FAS <sup>-</sup> HLA-DR <sup>-</sup>   | % of CD4 T cells                                           |
| 46 FAS <sup>-</sup> HLA-DR <sup>+</sup>   | % of CD4 T cells                                           |
| 47 PD-1 <sup>+</sup> HLA-DR <sup>-</sup>  | % of CD4 T cells                                           |
| 48 PD-1 <sup>+</sup> HLA-DR <sup>+</sup>  | % of CD4 T cells                                           |
| 49 PD-1 <sup>-</sup> HLA-DR <sup>-</sup>  | % of CD4 T cells                                           |
| 50 PD-1 <sup>-</sup> HLA-DR <sup>+</sup>  | % of CD4 T cells                                           |
| 51 HLA-DR <sup>+</sup>                    | % of CD4 T cells                                           |
| 52 PD-1 <sup>+</sup>                      | % of CD4 T cells                                           |
| 53 FAS <sup>+</sup>                       | % of CD4 T cells                                           |
| <b>CD8 T cells</b>                        |                                                            |
| 54 CD45RA <sup>+</sup> CD31 <sup>-</sup>  | % of CD8 T cells                                           |
| 55 CD45RA <sup>+</sup> CD31 <sup>+</sup>  | % of CD8 T cells                                           |
| 56 CD45RA <sup>+</sup> CD31 <sup>-</sup>  | % of CD8 T cells                                           |
| 57 CD45RA <sup>+</sup> CD31 <sup>+</sup>  | % of CD8 T cells                                           |
| 58 CD45RA <sup>+</sup> CD38 <sup>+</sup>  | % of CD8 T cells                                           |
| 59 CD45RA <sup>+</sup> CD38 <sup>-</sup>  | % of CD8 T cells                                           |
| 60 CD45RA <sup>+</sup> CD38 <sup>+</sup>  | % of CD8 T cells                                           |
| 61 CD45RA <sup>+</sup> CD38 <sup>-</sup>  | % of CD8 T cells                                           |
| 62 CD45RA <sup>+</sup>                    | % of CD8 T cells                                           |
| 63 CD45RA <sup>-</sup>                    | % of CD8 T cells                                           |
| 64 CD38 <sup>+</sup>                      | % of CD45RA <sup>-</sup> CD8 T cells                       |
| 65 CD31 <sup>+</sup>                      | % of CD45RA <sup>+</sup> CD8 T cells                       |
| 66 FAS <sup>+</sup> HLA-DR <sup>-</sup>   | % of CD8 T cells                                           |
| 67 FAS <sup>+</sup> HLA-DR <sup>+</sup>   | % of CD8 T cells                                           |
| 68 FAS <sup>-</sup> HLA-DR <sup>-</sup>   | % of CD8 T cells                                           |
| 69 FAS <sup>-</sup> HLA-DR <sup>+</sup>   | % of CD8 T cells                                           |
| 70 HLA-DR <sup>+</sup>                    | % of CD8 T cells                                           |
| 71 FAS <sup>+</sup>                       | % of CD8 T cells                                           |
| <b>CMV serology</b>                       |                                                            |
| 72 BIOFLASH CMV IgG                       | AU/mL                                                      |
| 73 BIO-FLASH CMV IgM                      | AU/mL                                                      |
| 74 BIOELISA CMV                           | OD-COV                                                     |

| Parameter                                                  | Unit                                                   |
|------------------------------------------------------------|--------------------------------------------------------|
| <b>CD4 T cells</b>                                         |                                                        |
| 75 Naive                                                   | % of CD4 T cells                                       |
| 76 Central memory                                          | % of CD4 T cells                                       |
| 77 Transitional memory                                     | % of CD4 T cells                                       |
| 78 Effector                                                | % of CD4 T cells                                       |
| 79 CD27 <sup>+</sup> CD45RA <sup>+</sup> CCR7 <sup>+</sup> | % of CD4 T cells                                       |
| 80 CD27 <sup>+</sup> CD45RA <sup>+</sup> CCR7 <sup>-</sup> | % of CD4 T cells                                       |
| 81 CD27 <sup>+</sup> CD45RA <sup>-</sup> CCR7 <sup>+</sup> | % of CD4 T cells                                       |
| 82 Effector memory                                         | % of CD4 T cells                                       |
| 83 TEMRA                                                   | % of CD4 T cells                                       |
| 84 CD57 <sup>+</sup>                                       | % of CD4 T cells                                       |
| 85 CD57 <sup>-</sup>                                       | % of naive CD4 T cells                                 |
| 86 CD57 <sup>+</sup>                                       | % of central memory CD4 T cells                        |
| 87 CD57 <sup>-</sup>                                       | % of transitional memory CD4 T cells                   |
| 88 CD57 <sup>+</sup>                                       | % of effector memory CD4 T cells                       |
| 89 Naive                                                   | % of CD8 T cells                                       |
| 90 Central memory                                          | % of CD8 T cells                                       |
| 91 Transitional memory                                     | % of CD8 T cells                                       |
| 92 Effector                                                | % of CD8 T cells                                       |
| 93 CD27 <sup>+</sup> CD45RA <sup>+</sup> CCR7 <sup>+</sup> | % of CD8 T cells                                       |
| 94 CD27 <sup>+</sup> CD45RA <sup>+</sup> CCR7 <sup>-</sup> | % of CD8 T cells                                       |
| 95 CD27 <sup>+</sup> CD45RA <sup>-</sup> CCR7 <sup>+</sup> | % of CD8 T cells                                       |
| 96 CD27 <sup>+</sup> CD45RA <sup>-</sup> CCR7 <sup>-</sup> | % of CD8 T cells                                       |
| 97 Revertant                                               | % of CD8 T cells                                       |
| 98 CD57 <sup>+</sup>                                       | % of CD8 T cells                                       |
| 99 CD57 <sup>-</sup>                                       | % of naive CD8 T cells                                 |
| 100 CD57 <sup>+</sup>                                      | % of central memory CD8 T cells                        |
| 101 CD57 <sup>-</sup>                                      | % of transitional memory CD8 T cells                   |
| 102 CD57 <sup>+</sup>                                      | % of effector memory CD8 T cells                       |
| 103 CD57 <sup>-</sup>                                      | % of revertant CD8 T cells                             |
| 104 Ki67 <sup>+</sup>                                      | % of CD4 T cells                                       |
| 105 Ki67 <sup>-</sup>                                      | % of CD4 non-Treg cells                                |
| 106 Treg classic (CD25 <sup>hi</sup> FOXP3 <sup>+</sup> )  | % of CD4 T cells                                       |
| 107 Ki67 <sup>+</sup>                                      | % of CD4 Treg classic                                  |
| 108 Treg Natural                                           | % of CD4 T cells                                       |
| 109 Treg Effector                                          | % of CD4 Treg natural                                  |
| 110 Treg CD25 <sup>hi</sup> CD127 <sup>low</sup>           | % of CD4 T cells                                       |
| 111 Treg CD25 <sup>br</sup>                                | % of CD4 T cells                                       |
| 112 Ki67 <sup>+</sup>                                      | % of CD4 Treg CD25 <sup>br</sup>                       |
| 113 Treg CD25 <sup>low</sup>                               | % of CD4 T cells                                       |
| 114 Ki67 <sup>+</sup>                                      | % of CD4 Treg CD25 <sup>low</sup>                      |
| 115 Treg CD25 <sup>br</sup> FOXP3 <sup>br</sup>            | % of CD4 T cells                                       |
| 116 Ki67 <sup>+</sup>                                      | % of CD4 Treg CD25 <sup>br</sup> FOXP3 <sup>br</sup>   |
| 117 Treg CD25 <sup>low</sup> FOXP3 <sup>low</sup>          | % of CD4 T cells                                       |
| 118 Ki67 <sup>+</sup>                                      | % of CD4 Treg CD25 <sup>low</sup> FOXP3 <sup>low</sup> |
| 119 Ki67 <sup>-</sup>                                      | % of CD8 T cells                                       |
| 120 Ki67 <sup>-</sup>                                      | % of CD8 non-Treg cells                                |
| 121 Treg classic (CD25 <sup>hi</sup> FOXP3 <sup>+</sup> )  | % of CD8 T cells                                       |
| 122 Ki67 <sup>+</sup>                                      | % of CD8 Treg classic                                  |

Supplementary Figure 1

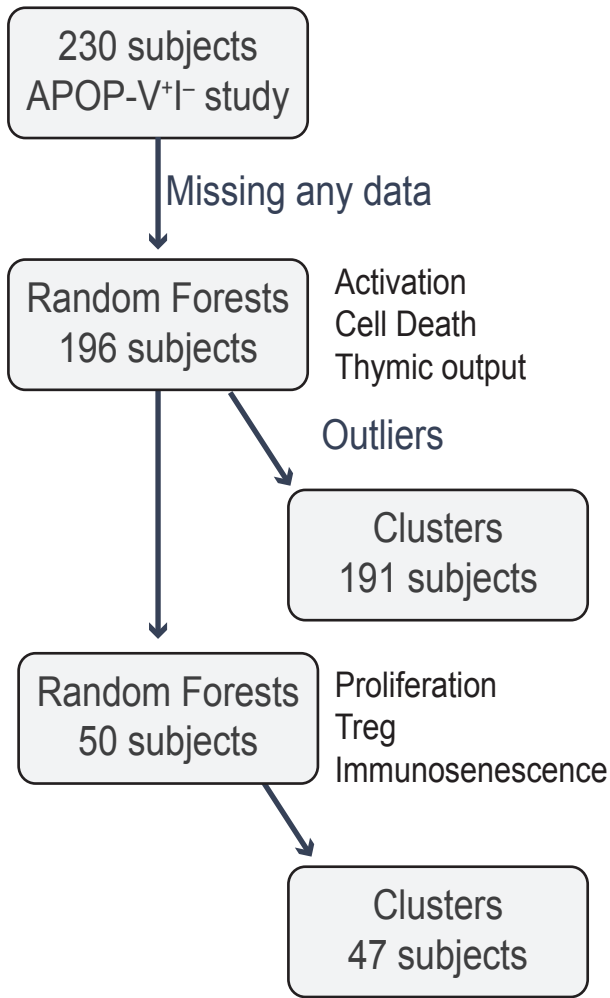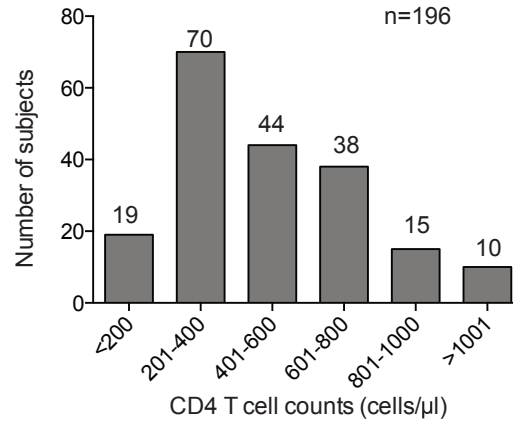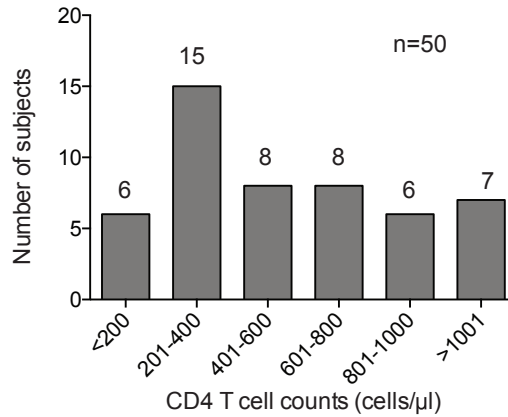

Supplementary Figure 1. Analysis strategy. The figure shows the starting cohort (references 19 and 20). Random forest approach classification was performed with 196 individuals with a complete dataset (see supplementary Table 1). The distribution of the different CD4 T-cell counts strata is shown for this subset. Hierarchical clustering and heatmaps were analyzed in a subgroup of 191 subjects after removal of outliers. In a subgroup of subjects, additional Treg, T-cell differentiation and proliferation parameters were analyzed (n=50). Strata according to CD4 T-cell counts is also shown for this subset.

Supplementary Figure 2

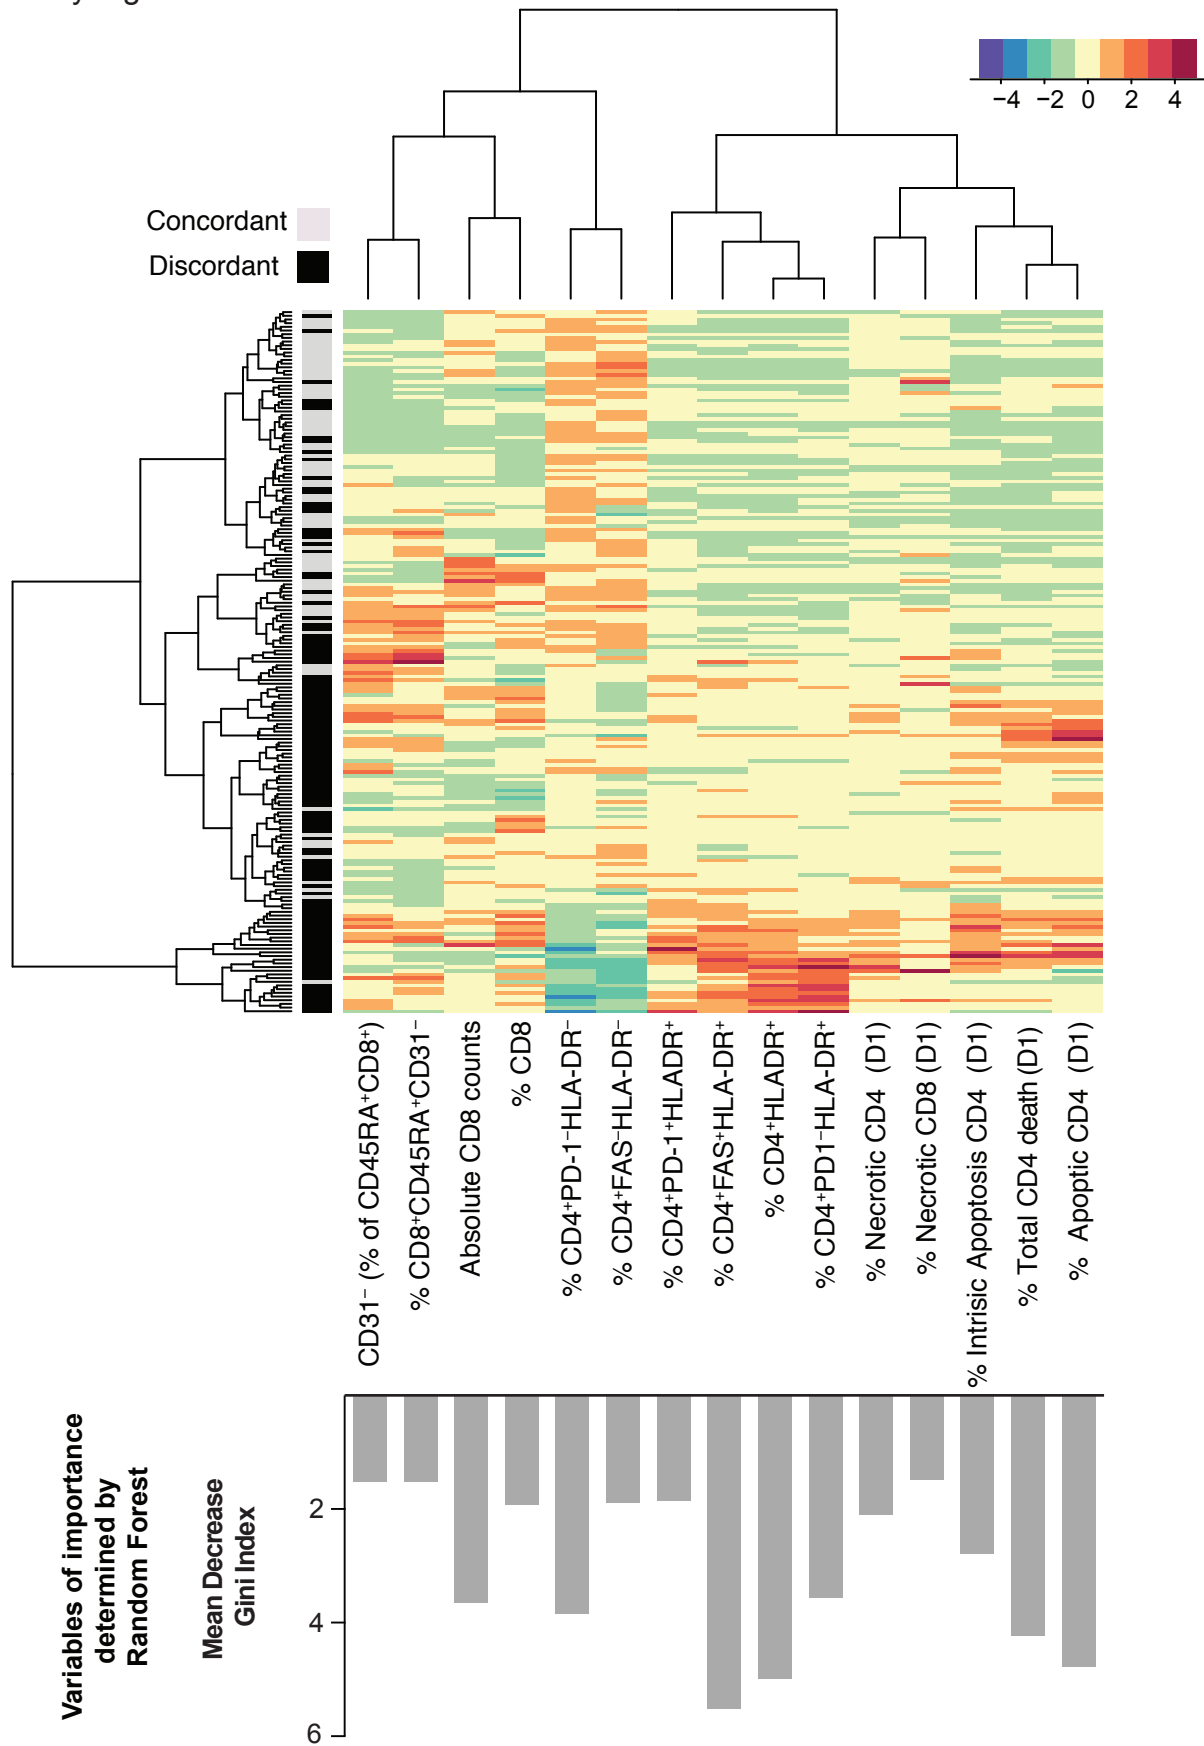

**Supplementary Figure 2.** Clustering of subjects according to variables of importance of the  $\Delta$ CD4 T-cell count value 350 cells/ $\mu$ L. Heatmap of 191 individuals generated using relevant parameters for classification shown in Figure 2. The output heatmap shows one small group of mostly immunodiscordant individuals (Group I) and a major group of intermingled immunodiscordant and immunoconcordant individuals. Color key is shown in the upper right side and Gini index for each variable is shown in the lower histogram.

Supplementary Figure 3

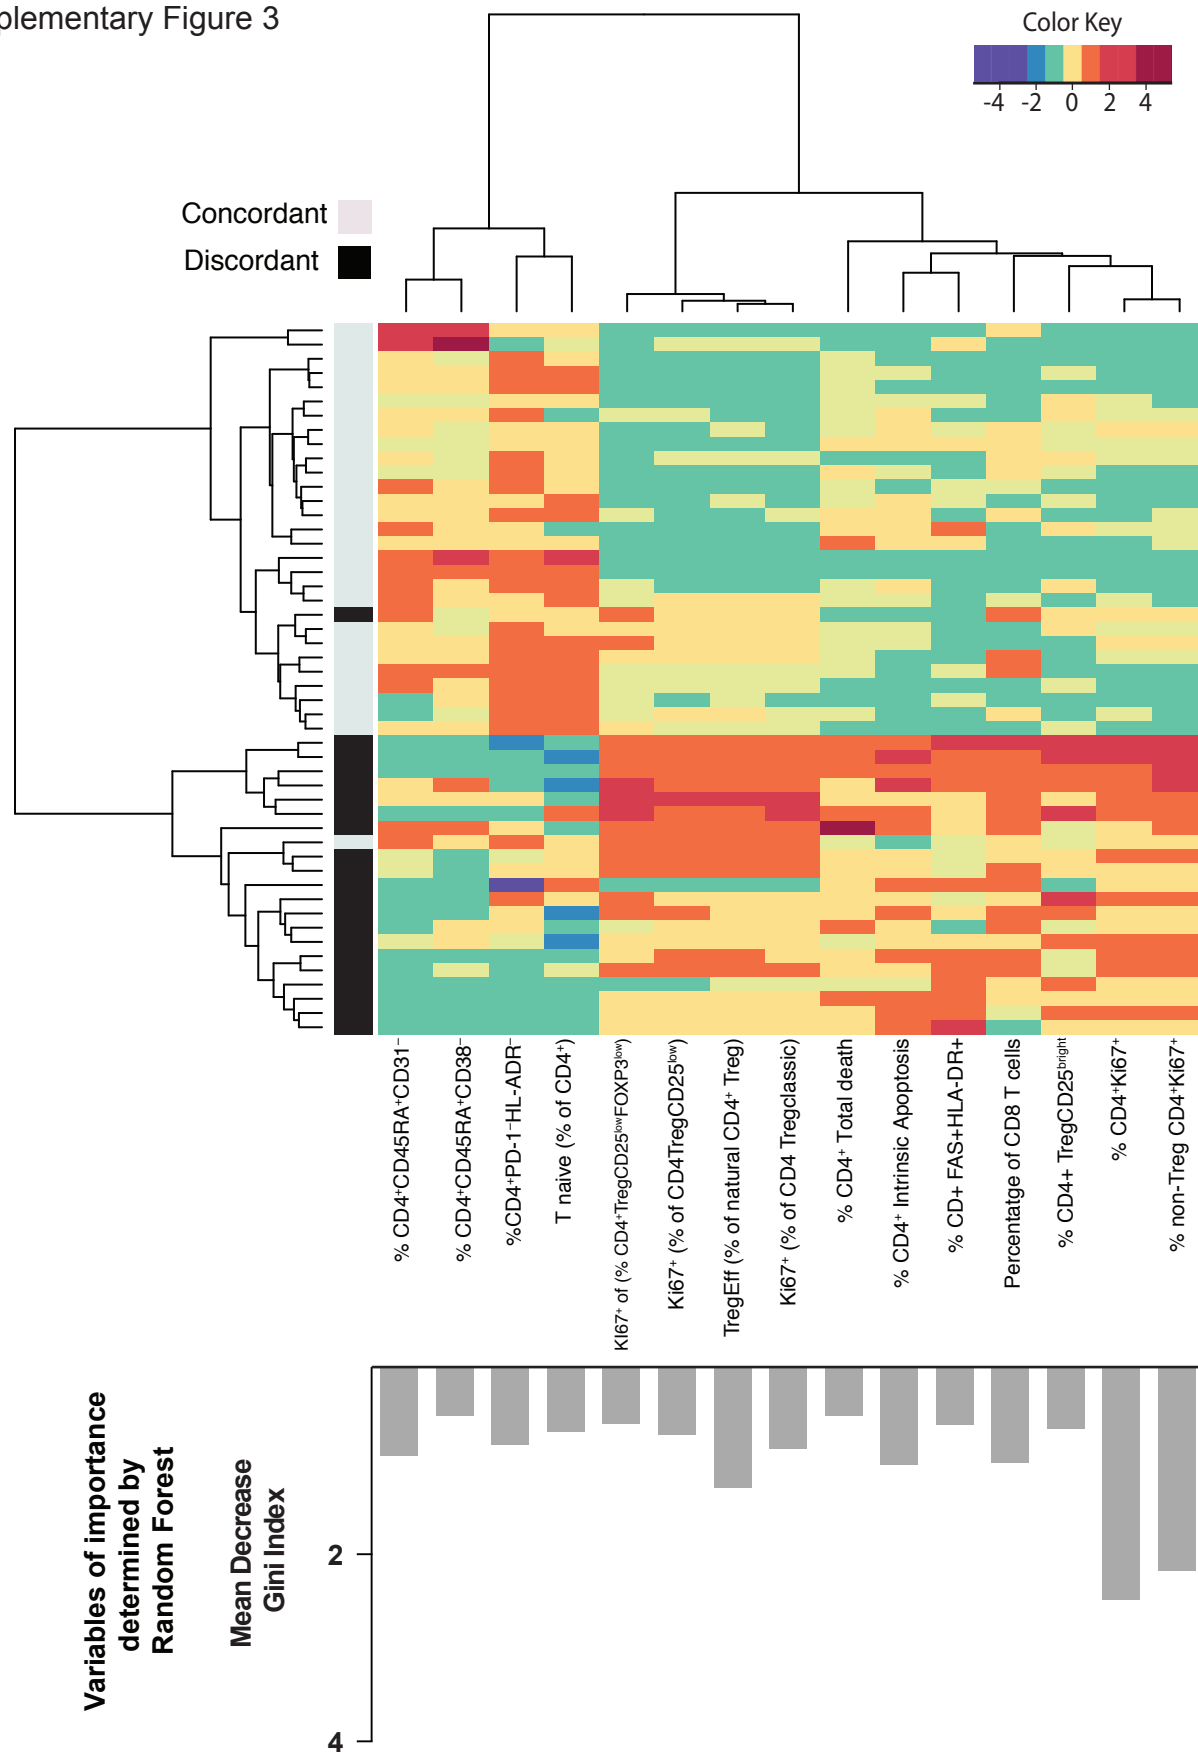

**Supplementary Figure 3.** Clustering of subjects according to variables of importance obtained from Treg, proliferation and differentiation data for a CD4 T-cell count cutoff 400 cells/ $\mu$ L. Heatmap of 49 individuals generated from activation, cell death, thymic output, Treg, proliferation, differentiation and immunosenescence data shows a clear segregation of immunodiscordant and immunoconcordant individuals. Color key is shown in the upper right side and Gini index for each variable is shown in the lower histogram.

# Supplementary Figure 4

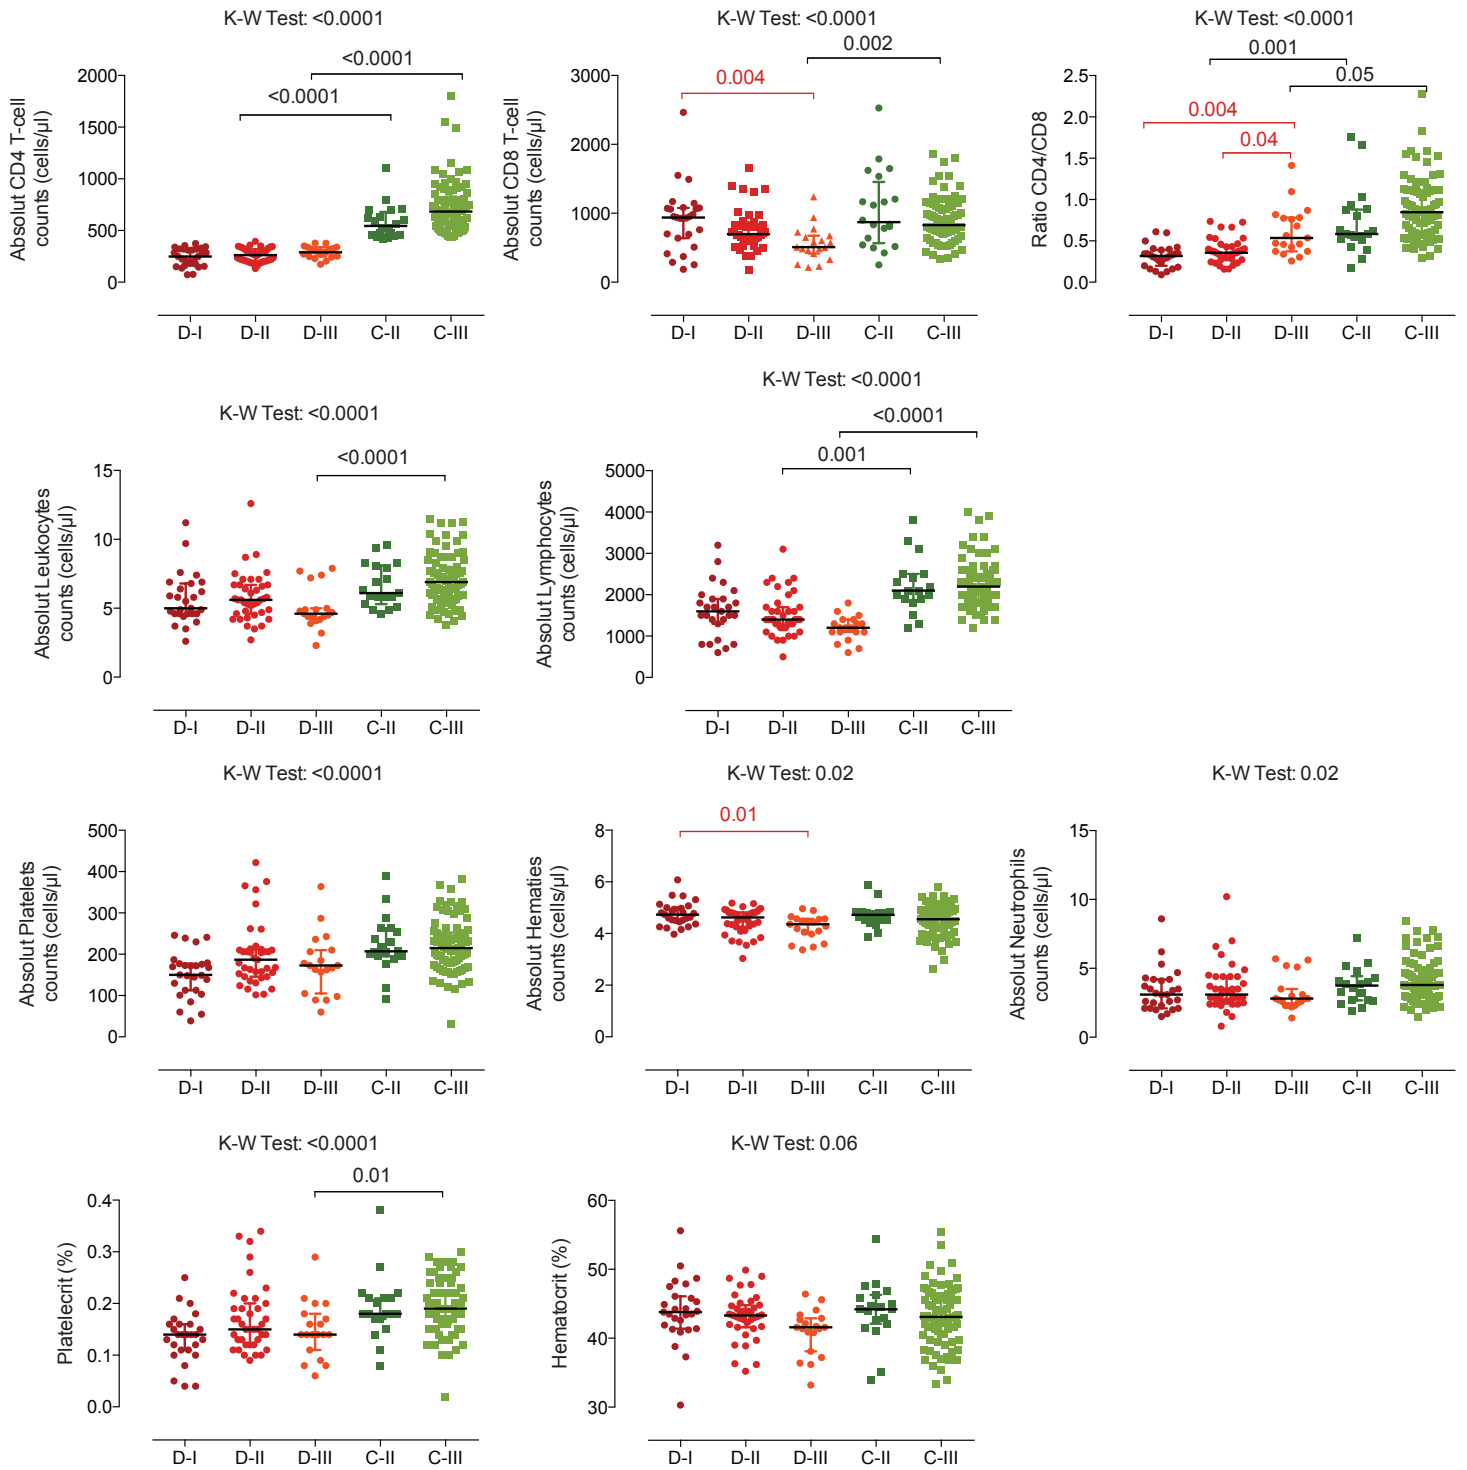

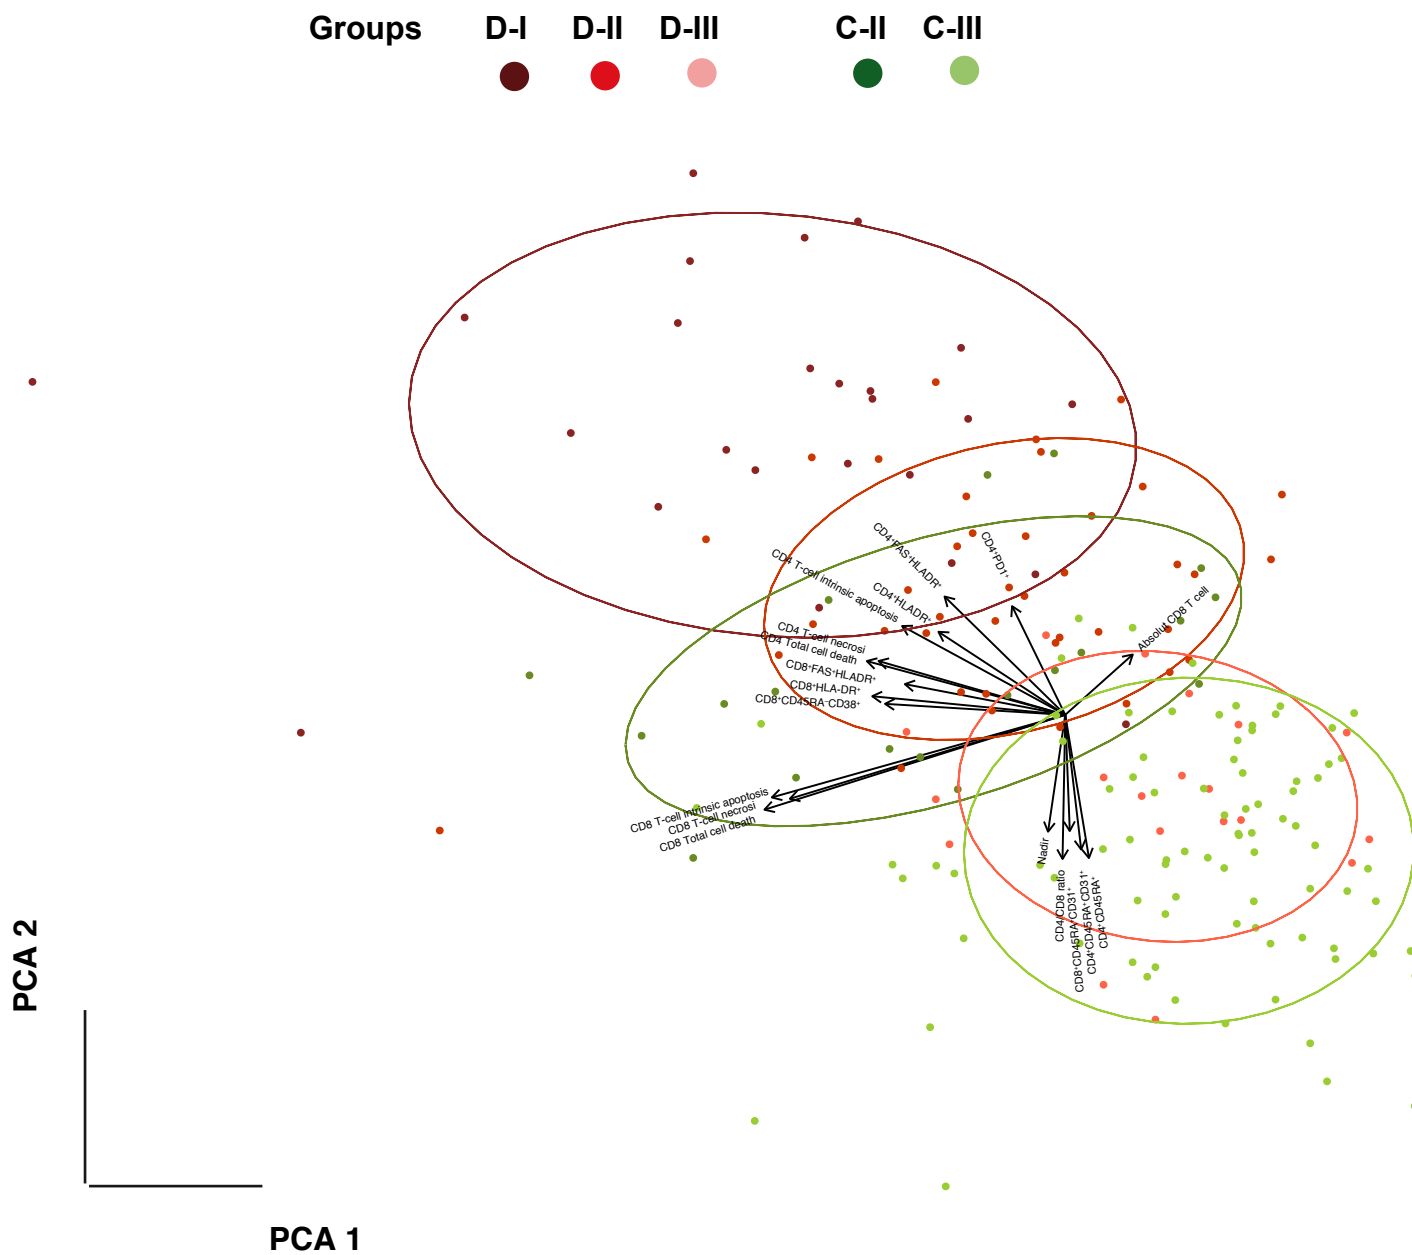

Supplementary Figure 4. PCA analysis of thymic output, cell death and activation data in CD4 and CD8 T cells. Data were standardized and a varimax rotation was performed on the two first components. Before rotation, the first two components accounted for 48% of the overall variability. Ellipses for each group represent a multivariate Normal contour at the 68% of confidence level (corresponding to a distance of one standard deviation from the mean). Colors represent the groups of previous clustering results

A

|              | <b>D-I</b> | <b>D-II</b> | <b>D-III</b> | <b>Classification error</b> |
|--------------|------------|-------------|--------------|-----------------------------|
| <b>D-I</b>   | 26         | 1           | 0            | 0.037                       |
| <b>D-II</b>  | 3          | 29          | 8            | 0.275                       |
| <b>D-III</b> | 0          | 4           | 15           | 0.210                       |

B

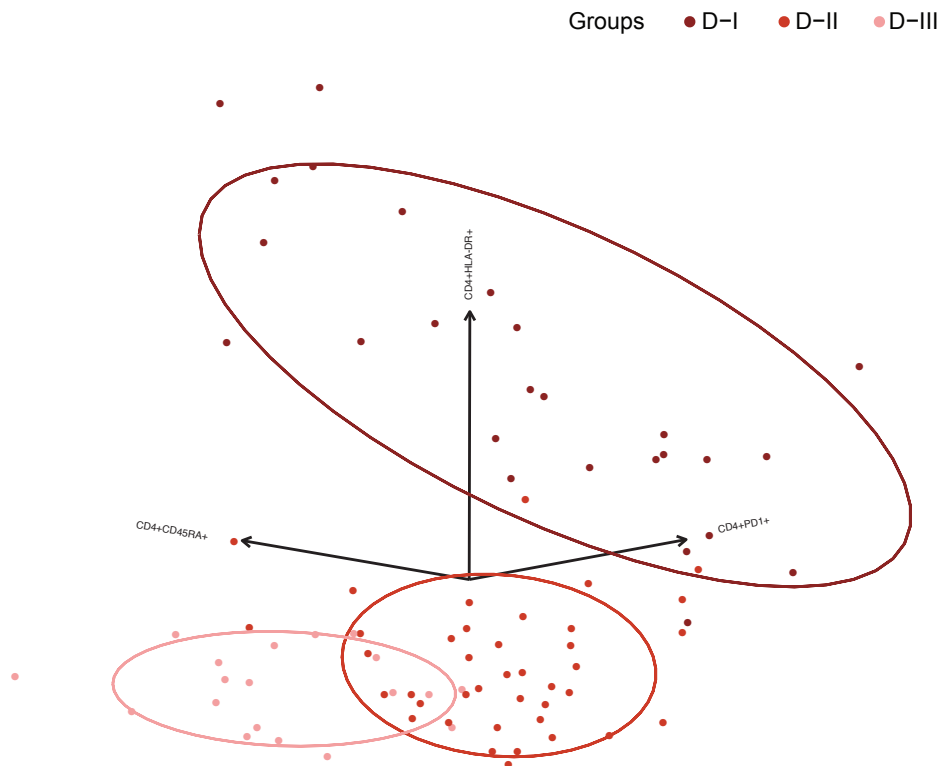

Supplementary Figure 5. Simplified classification of immunodiscordant subjects. The following parameters: frequency of  $CD4^+CD45RA^+$ ,  $CD4^+HLA-DR^+$  and  $CD4^+PD-1^+$  cells were selected according to differences among immunodiscordant subgroups in order to establish a simplified classification algorithm. (A). Confusion matrix to assess the ability of this simple classification algorithm to segregate D-I, D-II and D-III individuals. (B). PCA analysis of this classification. Ellipses for each group represent a multivariate Normal contour at the 68% of confidence level (corresponding to a distance of one standard deviation from the mean). Colors represent the groups of previous clustering results
